# Supplementary material for: Trends in hepatitis C virus seroprevalence and associated risk factors among men who have sex with men in Montréal: results from three cross-sectional studies (2005, 2009, 2018)
Source: PubMed Central journal article supplement — Sex Transm Infect. 2020 Jul 23;97(4):290–6. doi: 10.1136/sextrans-2020-054464 (PMC8165148; doi:10.1136/sextrans-2020-054464), 2020-07-23
Supplement: sextrans-2020-054464supp001.pdf [file sextrans-2020-054464supp001.pdf]

**Trends in hepatitis C virus seroprevalence and associated risk factors among men who have sex with men in Montréal: results from three cross-sectional studies (2005, 2009, 2018)**

**Supplementary files**

## Supplementary file 1: Additional references

- w1. Public Health Agency of Canada. M-Track: Enhanced surveillance of HIV, sexually transmitted and blood-borne infections, and associated risk behaviours among men who have sex with men in Canada. Phase 1 report. Public Health Agency of Canada; 2011.
- w2. Lambert GC J, Messier-Peet M, Apelian H, Moodie E. Engage Montréal, Portrait de la santé sexuelle des hommes de la région métropolitaine de Montréal ayant des relations sexuelles avec des hommes, Cycle 2017-2018, Faits saillants. Direction régionale de santé publique du CIUSSS du Centre-Sud-de-l'Île de Montréal; 2019.
- w3. Karon J, Wejnert C. Time-Location Sampling. In: Michalos AC, editor. Encyclopedia of Quality of Life and Well-Being Research. Dordrecht: Springer Netherlands; 2014. p. 6662-7.
- w4. Gallant SJ. Factors associated with recent HIV testing among Montréal men who have sex with men (MSM): Results from the ARGUS 2005 and 2008 surveys. McGill University (Canada) 2012.
- w5. World Health Organization Regional Office for the Eastern Mediterranean. Introduction to HIV/AIDS and sexually transmitted infection surveillance: module 4: introduction to respondent-driven sampling. World Health Organization; 2013.
- w6. Alborino F, Burighel A, Tiller FW, et al. Multicenter evaluation of a fully automated third-generation anti-HCV antibody screening test with excellent sensitivity and specificity. *Med Microbiol Immunol* 2011;200(2):77-83.
- w7. Harrell FE. General Aspects of Fitting Regression Models. In: Harrell JFE, editor. Regression Modeling Strategies: With Applications to Linear Models, Logistic and Ordinal Regression, and Survival Analysis. NYC, NY: Springer International Publishing; 2015:13-44.
- w8. Volz E, Heckathorn DD. Probability based estimation theory for respondent driven sampling. *J Official Stat* 2008;24(1):79.
- w9. Little R, Rubin D. Complete-case and available-case analysis, including weighting methods. In: Little R, Rubin D, eds. Statistical Analysis with Missing Data. Hoboken, NJ: John Wiley and Sons, 2019:41-58.
- w10. Zou G. A modified poisson regression approach to prospective studies with binary data. *Am J Epidemiol* 2004;159(7):702-6.
- w11. Barros AJ, Hirakata VN. Alternatives for logistic regression in cross-sectional studies: an empirical comparison of models that directly estimate the prevalence ratio. *BMC Med Res Methodol* 2003;3:21.

- w12. Yelland LN, Salter AB, Ryan P. Performance of the modified Poisson regression Approach for estimating relative risks from clustered prospective data. *Am J Epidemiol* 2011;174(8):984-92.
- w13. White IR, Royston P, Wood AM. Multiple imputation using chained equations: Issues and guidance for practice. *Stat Med* 2011;30(4):377-99.
- w14. van Buuren S, Groothuis-Oudshoorn K. mice: Multivariate Imputation by Chained Equations in R. *J Stat Softw* 2011;45(3):67.
- w15. VanderWeele Tyler J, Knol Mirjam J. A tutorial on interaction. *Epidemiol Methods* 2014;3(1):33-72.
- w16. Hosmer DW, Lemeshow S. Confidence interval estimation of interaction. *Epidemiology* 1992;3(5):452-6.
- w17. Zou GY. On the estimation of additive interaction by use of the four-by-two table and beyond. *Am J Epidemiol* 2008;168(2):212-24.
- w18. R Core Team. R: A language and environment for statistical computing. 3.5.3 ed: 2017.
- w19. Handcock MS, Gile KJ, Fellows IE, et al. RDS: Respondent-Driven Sampling. 0.9-0 ed: 2019.
- w20. Højsgaard S, Halekoh U, Yan J. geepack: Generalized Estimating Equation Package. 1.2-1 ed: 2016.
- w21. Wickham H, François R, Henry L, et al. dplyr: A Grammar of Data Manipulation. 0.8.3 ed: 2019.
- w22. Facente SN, Grebe E, Burk K, et al. Estimated hepatitis C prevalence and key population sizes in San Francisco: A foundation for elimination. *PLoS One* 2018;13(4):e0195575.
- w23. Tieu H-V, Laeyendecker O, Nandi V, et al. Prevalence and mapping of hepatitis C infections among men who have sex with men in New York City. *PLoS One* 2018;13(7):e0200269.
- w24. Trubnikov M, Yan P, Archibald C. Estimated prevalence of hepatitis C virus infection in Canada, 2011. *Canada communicable disease report = Relevé des maladies transmissibles au Canada* 2014;40(19):429-36.
- w25. Cox J, Lambert G, Tremblay F, et al. Hepatitis C virus (HCV) infection in men who have sex with men (MS) in Montreal: Results from the Argus 2005 Survey [abstract]. *15th Annual Canadian Conference on HIV/AIDS Research, Can J of Infect Dis Med* 2006. 17(Suppl. A): Abstract #340P, 52A.

- w26. Institut de la Statistique du Québec. L'Enquête québécoise sur la santé de la population, 2008 : pour en savoir plus sur la santé des Québécois. Institut de la Statistique du Québec; 2010.
- w27. Everett BG. Sexual orientation disparities in sexually transmitted infections: examining the intersection between sexual identity and sexual behavior. *Arch Sex Behav* 2013;42(2):225-36.
- w28. Sanchez J, Lama JR, Kusunoki L, et al. HIV-1, sexually transmitted infections, and sexual behavior trends among men who have sex with men in Lima, Peru. *JAIDS* 2007;44(5):578-85.
- w29. Wolitski RJ, Jones KT, Wasserman JL, et al. Self-identification as “down low” among men who have sex with men (MSM) from 12 US cities. *AIDS Behav* 2006;10(5):519-29.
- w30. Shah H, Bilodeau M, Burak KW, et al. The management of chronic hepatitis C: 2018 guideline update from the Canadian Association for the Study of the Liver. *Can Med Assoc J* 2018;190(22):E677-E87.

Supplementary file 2: Eligibility criteria for participating in the Argus 1 (2005), Argus 2 (2009), and Engage (2018) studies conducted in Montréal, Québec (Canada).

---

| <b>Study</b>          | <b>Eligibility criteria</b>                                                                                                                                                                                                                                                                                                                                                                                                                                                     |
|-----------------------|---------------------------------------------------------------------------------------------------------------------------------------------------------------------------------------------------------------------------------------------------------------------------------------------------------------------------------------------------------------------------------------------------------------------------------------------------------------------------------|
| <b>Argus 1 (2005)</b> | <ul style="list-style-type: none"><li>- Gender-identify as a man</li><li>- Have ever had sex with a man</li><li>- Be 18 years of age or older</li><li>- Speak French or English</li><li>- Reside on the island of Montréal</li><li>- Be able to provide informed consent</li></ul>                                                                                                                                                                                              |
| <b>Argus 2 (2009)</b> | <ul style="list-style-type: none"><li>- Gender-identify as a man</li><li>- Have ever had sex with a man</li><li>- Be 18 years of age or older</li><li>- Speak French or English</li><li>- Reside in the province of Quebec</li><li>- Be able to provide informed consent</li></ul>                                                                                                                                                                                              |
| <b>Engage (2018)</b>  | <ul style="list-style-type: none"><li>- Gender-identify as a man</li><li>- Report sexual activity with a man in the past 6 months</li><li>- Be 16 years of age or older</li><li>- Be able to complete a computer-based questionnaire in French or English</li><li>- Reside in the greater Montréal region</li><li>- Be able to provide informed consent</li><li>- Receive a voucher for participation in the study, or be purposively invited to be an initial “seed”</li></ul> |

---

Supplementary file 3: Standardized HCV seroprevalence among all men who have sex with men (MSM) and stratified by HIV status, by injection drug use status, and by age group, in 2005, 2009, and 2018 in Montréal, Québec (Canada).

| Group                                            | Standardized HCV seroprevalence (95% confidence interval) |            |             |
|--------------------------------------------------|-----------------------------------------------------------|------------|-------------|
|                                                  | 2005                                                      | 2009       | 2018        |
| <b>All MSM</b>                                   | 7% (3-10)                                                 | 8% (1-9)   | 8% (4-11)   |
| <b>MSM living with HIV</b>                       | 17% (6-25)                                                | 8% (2-16)  | 17% (6-29)  |
| <b>HIV-negative MSM</b>                          | 6% (3-8)                                                  | 8% (0-9)   | 6% (3-9)    |
| <b>MSM with a history of IDU</b>                 | 74% (62-85)                                               | 37% (8-48) | 60% (42-77) |
| <b>MSM without a history IDU</b>                 | 3% (1-4)                                                  | 2% (0-3)   | 2% (1-4)    |
| <b>MSM aged &lt;30 years old</b>                 | 6% (2-9)                                                  | 3% (0-3)   | 0% (0-1)    |
| <b>MSM aged 30-44 years old</b>                  | 9% (3-12)                                                 | 10% (1-12) | 8% (2-15)   |
| <b>MSM aged ≥45 years old</b>                    | 6% (1-9)                                                  | 9% (0-12)  | 17% (9-24)  |
| <b>HIV-negative MSM without a history of IDU</b> | 2% (1-3)                                                  | 2% (0-4)   | 1% (0-2)    |

IDU: injection drug use; MSM: men who have sex with men.

Supplementary file 4: Adjusted prevalence ratios of multiplicative interaction terms and relative excess risk due to interaction of selected potential risk factors for HCV seropositivity pooling three cross-sectional surveys of men who have sex with men in Montréal, Québec (Canada; 2005, 2009, 2018).

| <b>Interaction studied</b>                                                        | <b>Exponentiated coefficient of the multiplicative interaction term (95% confidence interval)</b> | <b>Relative excess risk due to interaction (95% confidence interval)</b> |
|-----------------------------------------------------------------------------------|---------------------------------------------------------------------------------------------------|--------------------------------------------------------------------------|
| <b>HIV infection; CAS with a man of serodiscordant/ unknown HIV status (P6M)</b>  | 1.0 (0.4; 2.3)                                                                                    | -0.5 (-1.5; 0.9)                                                         |
| <b>HIV infection; &gt;5 male sexual partners (P6M)</b>                            | 0.9 (0.5; 1.6)                                                                                    | -0.8 (-1.7; 0.1)                                                         |
| <b>HIV infection; transactional sex (P6M)</b>                                     | 0.6 (0.4; 0.9)                                                                                    | -3.3 (-4.6; -2.3)                                                        |
| <b>HIV infection; group sex (P6M)</b>                                             | 0.9 (0.5; 1.7)                                                                                    | -0.8 (-1.7; 0.2)                                                         |
| <b>History of IDU; CAS with a man of serodiscordant/ unknown HIV status (P6M)</b> | 1.0 (0.5; 1.9)                                                                                    | -6.7 (-10.2; -4.1)                                                       |
| <b>History of IDU; &gt;5 male sexual partners (P6M)</b>                           | 1.1 (0.7; 1.8)                                                                                    | -6.5 (-10.6; -3.8)                                                       |
| <b>History of IDU; transactional sex (P6M)</b>                                    | 0.9 (0.6; 1.6)                                                                                    | -8.9 (-13.9; -5.6)                                                       |
| <b>History of IDU; group sex (P6M)</b>                                            | 2.0 (1.1; 3.7)                                                                                    | -4.6 (-7.9; -1.7)                                                        |

CAS: condomless anal sex; IDU: lifetime injection drug use; P6M: past 6 months.

These interaction terms were included in the multivariable model described in table 4, separately.

All the variables used in the interaction terms are binary (coded 0,1).
