# Supplementary material for: Trends in hepatitis C virus seroprevalence and associated risk factors among men who have sex with men in Montréal: results from three cross-sectional studies (2005, 2009, 2018)
Source: PubMed Central journal article supplement — Sex Transm Infect. 2020 Jul 23;97(4):290–6. doi: 10.1136/sextrans-2020-054464 (PMC8165148; doi:10.1136/sextrans-2020-054464), 2020-07-23
Supplement: sextrans-2020-054464supp002.pdf [file sextrans-2020-054464supp002.pdf]

## Objectifs

La micro-élimination du virus de l'hépatite C (VHC) parmi les hommes ayant des relations sexuelles avec d'autres hommes (HARSAH) est une priorité de santé publique. Pour atteindre cet objectif, une compréhension locale des épidémies est nécessaire. Notre étude vise à estimer les tendances temporelles de la séroprévalence du VHC entre 2005-2018 parmi les HARSAH à Montréal, et identifier les facteurs socio-économiques, comportementaux, et biologiques associés avec l'exposition au VHC dans cette population.

## Méthodes

Nous avons utilisé les données de trois études transversales menées parmi des HARSAH montréalais en 2005 (n=1,795), 2009 (n=1,258) et 2018 (n=1,086). Pour comparer la séroprévalence au cours du temps, nous avons standardisé les échantillons espace-temps (2005 et 2009) à l'échantillon déterminé selon les répondants (2018). Les tendances temporelles globale et stratifiées par statut VIH, antécédents d'usage de drogues par injection (UDI) et groupe d'âge ont été examinées. Nous avons utilisé des modèles de régression de Poisson modifiée avec des équations d'estimation généralisée pour identifier les facteurs associés avec l'exposition au VHC.

## Résultats

La séroprévalence standardisée du VHC parmi les HARSAH est restée stable (7% en 2005, 8% en 2009, 8% en 2018), avec des tendances temporelles divergentes entre les groupes d'âges (diminution parmi ceux de <30 ans, augmentation parmi ceux de ≥45 ans). Les antécédents d'UDI constituent le principal prédicteur de la séropositivité au VHC, et aucune association claire n'a été observée avec les facteurs sexuels étudiés (rapports anaux avec des hommes de statut VIH inconnu/sérodiscordant, nombre de partenaires, sexe en groupe).

## Conclusion

La séroprévalence du VHC est demeurée stable mais élevée parmi les HARSAH montréalais entre 2005-2018. Contrairement à d'autres contextes, l'UDI constitue le facteur prééminent de prévalence du VHC. Comprendre l'intersection des populations, des contextes, et des pratiques d'UDI parmi les HARSAH est essentiel pour prévenir la transmission du VHC dans ce groupe.
